# Supplementary material for: Electrochemical Investigation of Curcumin–DNA Interaction by Using Hydroxyapatite Nanoparticles–Ionic Liquids Based Composite Electrodes
Source: MDPI journal article supplement (doi:10.3390/ma14154344), 2021-08-03
Supplement: s1 [file s1]

Supplementary Materials

# Electrochemical Investigation of Curcumin–DNA Interaction by Using Hydroxyapatite Nanoparticles–Ionic Liquids Based Composite Electrodes

Merve Uca <sup>1,2</sup>, Ece Eksin <sup>2</sup>, Yasemin Erac <sup>3</sup> and Arzum Erdem <sup>1,2,\*</sup>

<sup>1</sup> Biotechnology Department, Graduate School of Natural and Applied Sciences, Ege University, 35100 Izmir, Turkey; merve.uca@hotmail.com

<sup>2</sup> Analytical Chemistry Department, Faculty of Pharmacy, Ege University, 35100 Izmir, Turkey; eceksin@hotmail.com

<sup>3</sup> Pharmacology Department, Faculty of Pharmacy, Ege University, 35100 Izmir, Turkey; yasemin.erac@ege.edu.tr

\* Correspondence: arzum.erdem@ege.edu.tr or arzume@hotmail.com

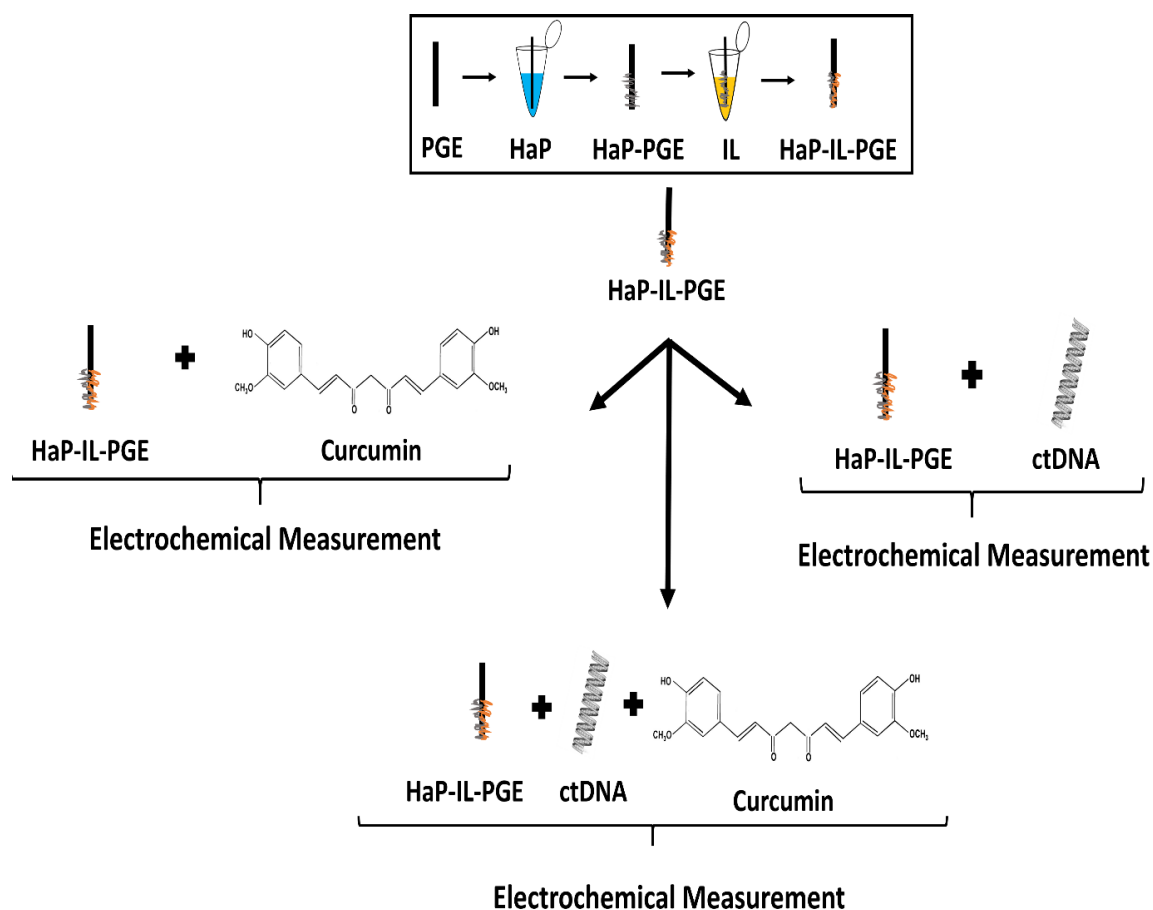

**Scheme S1.** The schematic model for the construction of HaP-IL-PGE, immobilization of DNA or Curcumin, and the electrochemical monitoring of Curcumin-ctDNA interaction with HaP-IL-PGEs.

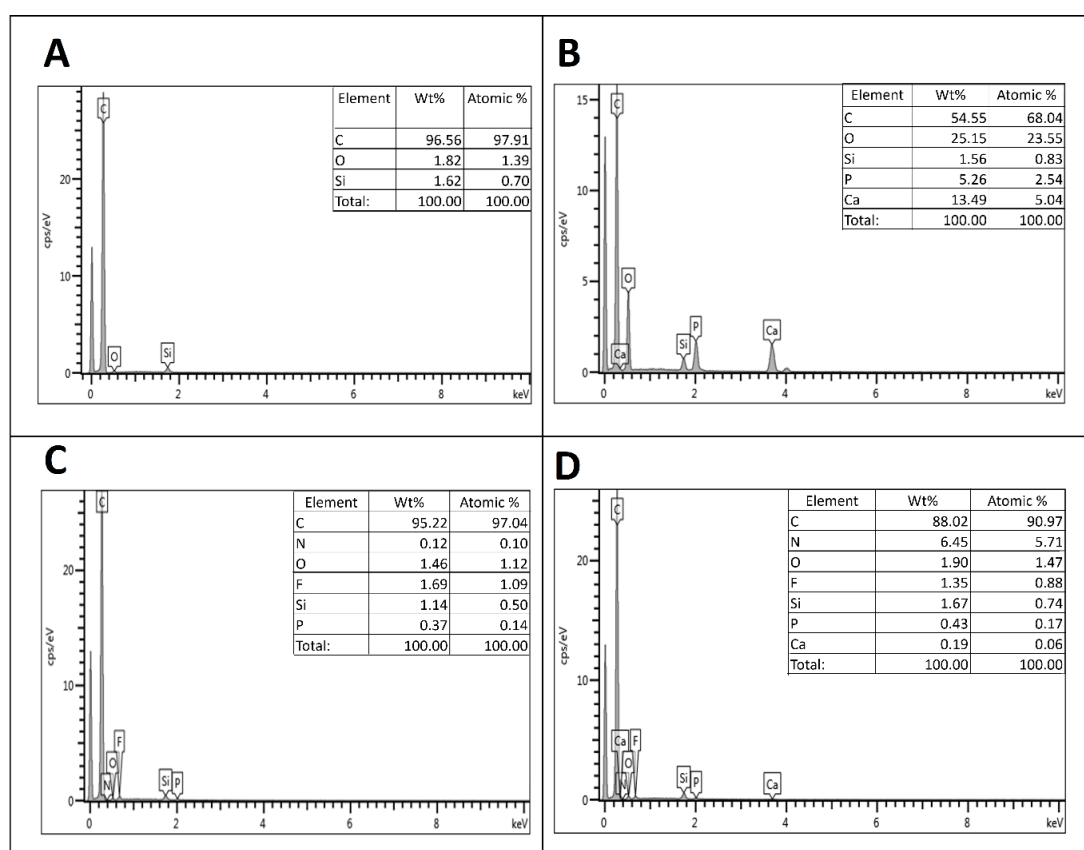

**Figure S1.** Graphs representing the elemental percentages of (A) PGE, (B) HaP, (C) IL and (D) HaP-IL-PGE obtained by EDX analysis.

**Table S1.** The average anodic peak currents ( $I_a$ ) with their calculated surface areas ( $n = 3$ ).

| Electrode  | $I_a$ ( $\mu A$ )                 | Surface Area ( $cm^2$ ) |
|------------|-----------------------------------|-------------------------|
| PGE        | $87.4 \pm 10.3$ (RSD % = 11.7 %)  | 0.27                    |
| HaP-PGE    | $92.2 \pm 12.2$ (RSD % = 13.21 %) | 0.29                    |
| IL-PGE     | $108.7 \pm 7$ (RSD % = 6.4 %)     | 0.31                    |
| HaP-IL-PGE | $115.9 \pm 8.7$ (RSD % = 7.5 %)   | 0.35                    |

**Table S2.** The average  $R_{ct}$  values of each of electrodes ( $n = 3$ ) with the decrease % ratio calculated contrast to the one of PGE.

| Electrode  | $R_{ct}$ (Ohm)                   | Decrease % at $R_{ct}$ |
|------------|----------------------------------|------------------------|
| PGE        | $116.5 \pm 2.1$ (RSD % = 1.8 %)  | -                      |
| HaP-PGE    | $54.6 \pm 14.5$ (RSD % = 26.6 %) | 58.2%                  |
| IL-PGE     | $33.2 \pm 2.6$ (RSD % = 8.1 %)   | 71.5%                  |
| HaP-IL-PGE | $30.8 \pm 2.4$ (RSD % = 7.4 %)   | 73.5%                  |

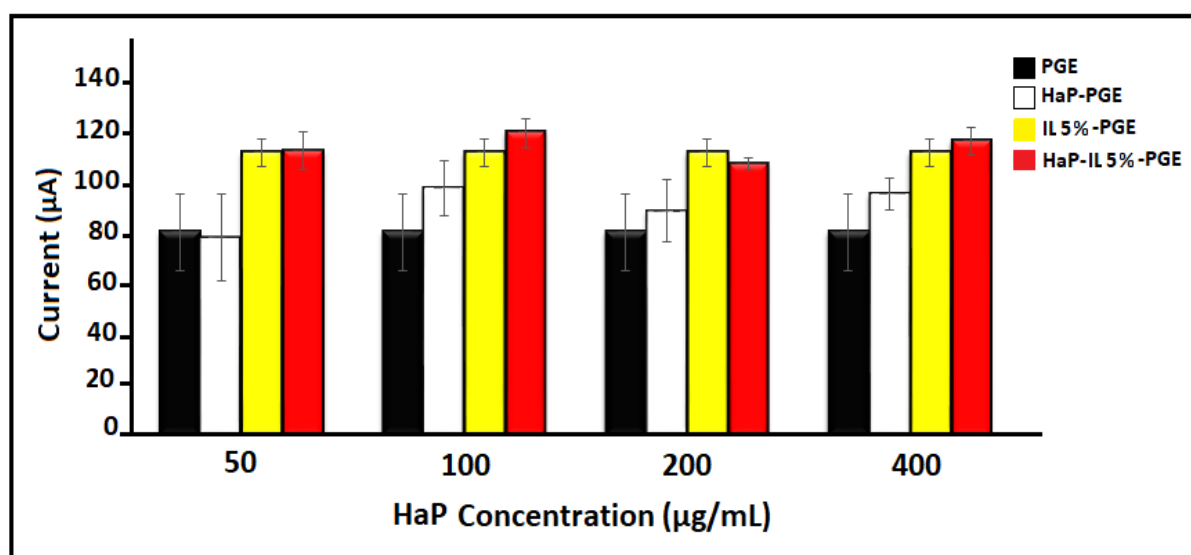

**Figure S2.** Histograms representing the average oxidation signals measured before and after modification of different HaP concentrations onto the electrode surfaces in the presence of 5 % IL ( $n = 13$ ).

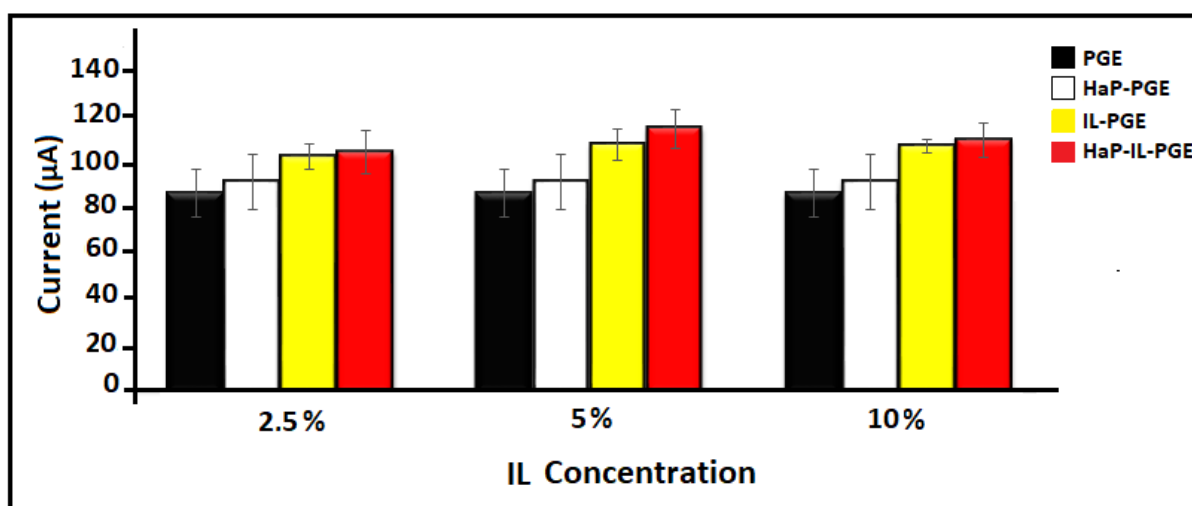

**Figure S3.** Histograms representing the average oxidation signals measured before and after modification of different IL percentages onto the electrode surfaces in the presence of 100  $\mu\text{g/mL}$  HaP ( $n = 9$ ).

**Table S3.** The effect of IL % onto the response with the average anodic peak currents ( $I_a$ ) ( $n = 9$ ).

|           |            | IL %  | $I_a$ ( $\mu\text{A}$ )         |
|-----------|------------|-------|---------------------------------|
| Electrode | IL-PGE     | 2.5 % | $103.8 \pm 5.7$ (RSD % = 5.5 %) |
|           |            | 5 %   | $108.7 \pm 7.0$ (RSD % = 6.4 %) |
|           |            | 10 %  | $108.2 \pm 2.9$ (RSD % = 2.7 %) |
|           | HaP-IL-PGE | 2.5 % | $105.6 \pm 9.4$ (RSD % = 8.9 %) |
|           |            | 5 %   | $115.9 \pm 8.7$ (RSD % = 7.5 %) |
|           |            | 10 %  | $110.9 \pm 7.5$ (RSD % = 6.8 %) |

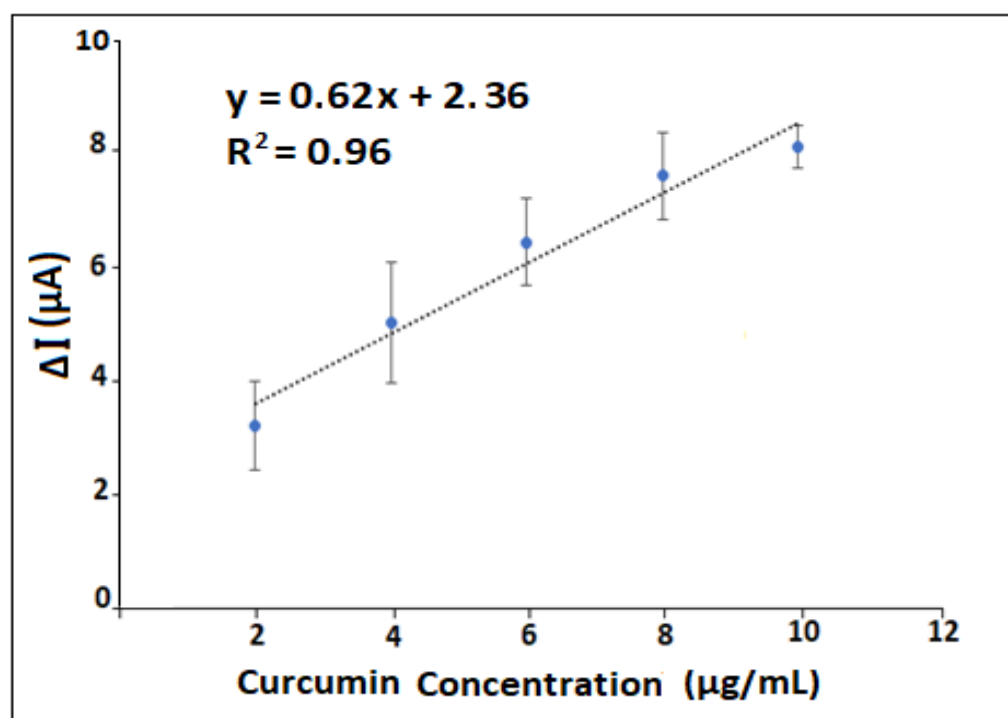

**Figure S4.** Calibration plot based on the average Curcumin oxidation signals in the presence of various Curcumin concentrations between 2 and 10 μg/mL using HaP-IL-PGEs ( $n = 9$ ).

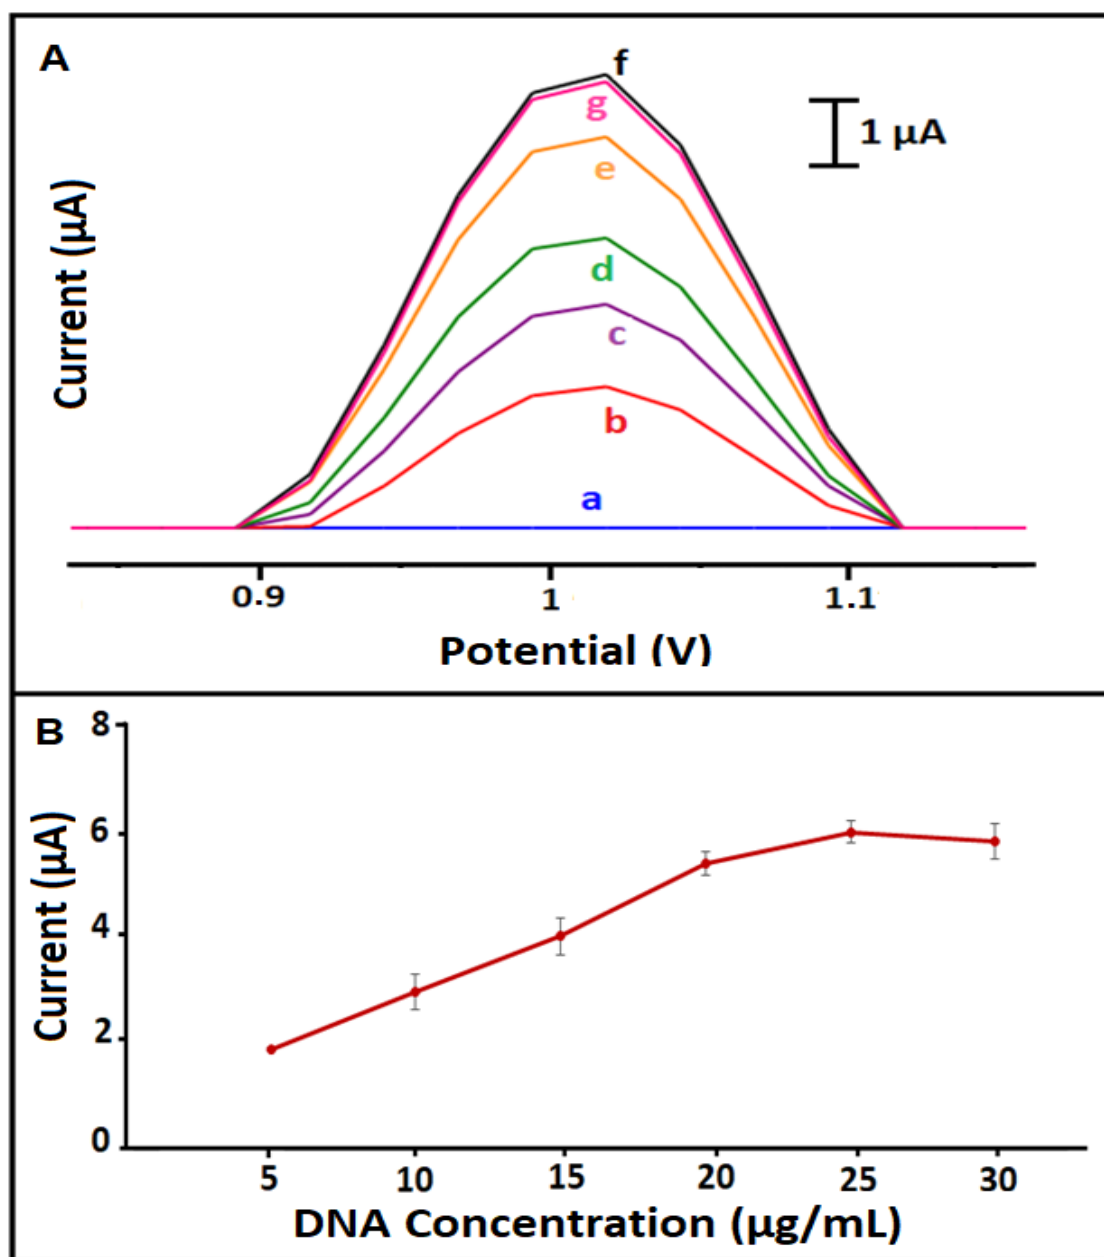

**Figure S5.** (A) DPVs representing the average guanine signals obtained after immobilization of (a) 5, (b) 10, (c) 15, (d) 20, (e) 25, (f) 30  $\mu\text{g/mL}$  ctDNA onto the surface of HaP-IL-PGEs. (B) The line graph based on the average guanine oxidation signals obtained by HaP-IL-PGE ( $n = 3$ ).

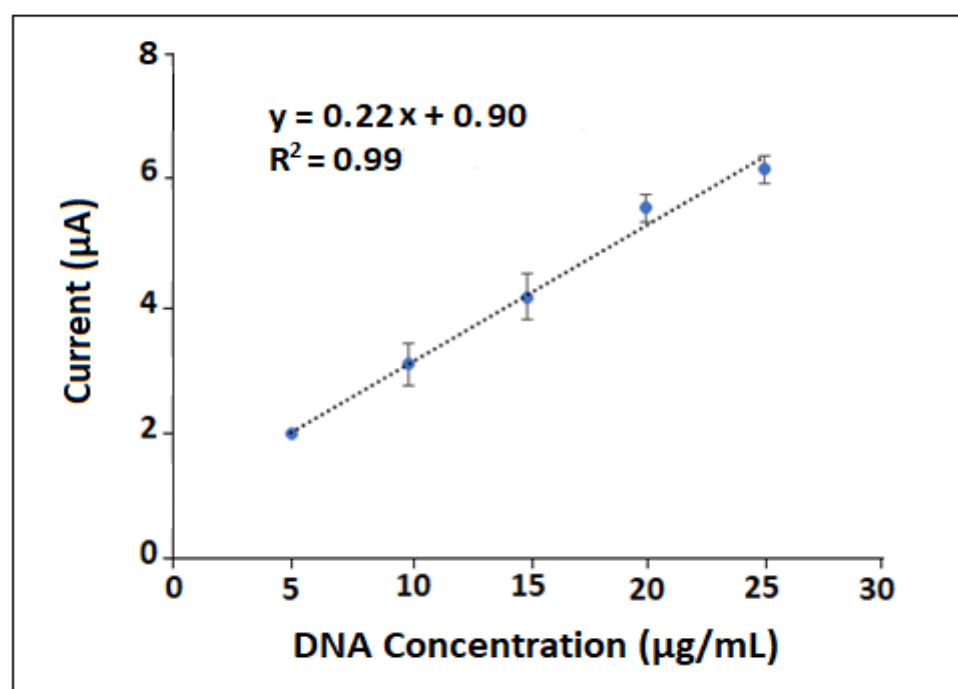

**Figure S6.** Calibration plot based on the average guanine oxidation signals in the presence of various DNA concentrations between 5 and 25  $\mu\text{g/mL}$  using HaP-IL-PGEs ( $n = 3$ ).

**Table S4.** The average oxidation signals of Curcumin before and after different interaction times and change ratios after interaction process between Curcumin and ctDNA ( $n = 6$ ).

| Interaction time (min) | Curcumin signal before interaction ( $\mu\text{A}$ ) | Current ( $I$ , $\mu\text{A}$ )                     | Change % at Curcumin signal | Curcumin signal before interaction ( $\mu\text{A}$ ) | Delta Current ( $\Delta I$ , $\mu\text{A}$ )*       | Change % at Curcumin signal |
|------------------------|------------------------------------------------------|-----------------------------------------------------|-----------------------------|------------------------------------------------------|-----------------------------------------------------|-----------------------------|
|                        |                                                      | Curcumin signal after interaction ( $\mu\text{A}$ ) |                             |                                                      | Curcumin signal after interaction ( $\mu\text{A}$ ) |                             |
| 1                      | $5.1 \pm 0.6$                                        | $5.2 \pm 1.2$                                       | 3.2 % $\uparrow$            | $3.4 \pm 0.6$                                        | $3.6 \pm 1.2$                                       | 4.8 % $\uparrow$            |
| 3                      | $7.3 \pm 0.6$                                        | $6.1 \pm 0.7$                                       | 15.7 % $\downarrow$         | $5.6 \pm 0.6$                                        | $4.5 \pm 0.7$                                       | 20.2 % $\downarrow$         |
| 5                      | $8.5 \pm 1.4$                                        | $7.7 \pm 1.1$                                       | 9.1 % $\downarrow$          | $6.9 \pm 1.4$                                        | $6.1 \pm 1.1$                                       | 11.3 % $\downarrow$         |

\*the average signal of control experiment by HaP-IL-PGE was measured at +0.56 V as  $1.6 \pm 0.2 \mu\text{A}$  (RSD % = 9.63 %,  $n = 6$ ) that was also overlapping with the oxidation signal of Curcumin measured at +0.56 V. Therefore **Delta Current ( $\Delta I$ )** was calculated by subtracting the control signal of HaP-IL-PGE from curcumin signal.

**Table S5.** The average oxidation signals of Curcumin before and after different interaction times and decrease ratios after interaction process between Curcumin and PCR samples ( $n = 6$ ).

| Interaction time (min) | Curcumin signal before interaction ( $\mu\text{A}$ ) | Current ( $I$ , $\mu\text{A}$ )                     | Decrease % at Curcumin signal | Curcumin signal before interaction ( $\mu\text{A}$ ) | Delta Current ( $\Delta I$ , $\mu\text{A}$ )*       | Decrease % at Curcumin signal |
|------------------------|------------------------------------------------------|-----------------------------------------------------|-------------------------------|------------------------------------------------------|-----------------------------------------------------|-------------------------------|
|                        |                                                      | Curcumin signal after interaction ( $\mu\text{A}$ ) |                               |                                                      | Curcumin signal after interaction ( $\mu\text{A}$ ) |                               |
| 1                      | $5.5 \pm 1.1$                                        | $5.4 \pm 0.4$                                       | 2.2 %                         | $4 \pm 1.1$                                          | $3.8 \pm 0.4$                                       | 3.1 %                         |
| 3                      | $8.0 \pm 0.8$                                        | $7.7 \pm 0.8$                                       | 4.7 %                         | $6.5 \pm 0.8$                                        | $6.1 \pm 0.8$                                       | 5.8 %                         |
| 5                      | $9.3 \pm 1.3$                                        | $9 \pm 0.6$                                         | 3.6 %                         | $7.8 \pm 1.3$                                        | $7.4 \pm 0.6$                                       | 4.3 %                         |

\*the average signal of control experiment by HaP-IL-PGE was measured at +0.56 V as  $1.6 \pm 0.2 \mu\text{A}$  (RSD % = 9.63 %,  $n = 6$ ) that was also overlapping with the oxidation signal of Curcumin measured at +0.56 V. Therefore **Delta Current ( $\Delta I$ )** was calculated by subtracting the control signal of HaP-IL-PGE from curcumin signal.

**Table S6.** The average oxidation signals of guanine before and after different interaction times and change ratios after interaction process between Curcumin and PCR samples ( $n = 6$ ).

| Interaction time (min) | Guanine signal before interaction ( $\mu\text{A}$ ) | Guanine signal after interaction ( $\mu\text{A}$ ) | Decrease % at Guanine signal |
|------------------------|-----------------------------------------------------|----------------------------------------------------|------------------------------|
| 1                      | $4.6 \pm 0.3$<br>(RSD % = 7 %)                      | $3.8 \pm 0.7$<br>(RSD % = 16.99 %)                 | 16 %                         |
| 3                      |                                                     | $3.2 \pm 0.2$<br>(RSD % = 4.3 %)                   | 30 %                         |
| 5                      |                                                     | $2.6 \pm 0.3$<br>(RSD % = 13.5 %)                  | 44.1 %                       |
